# Supplementary material
Source: MDPI journal article supplement (https://www.mdpi.com/2311-7524/10/5/493)
Supplement: s1 [file s1]

**Table S1.** Results from the statistical analysis.

| Rendimiento/planta                        |       |          |          |        |
|-------------------------------------------|-------|----------|----------|--------|
| Producto                                  | Dosis | Rep      |          |        |
|                                           |       | I        | II       | III    |
| 1                                         | 1     | 16,13    | 13,18    | 16,01  |
| 1                                         | 5     | 13,16    | 20,15    | 19,79  |
| 1                                         | 10    | 18,43    | 13,65    | 20,65  |
| 2                                         | 1     | 21,06    | 16,71    | 8,84   |
| 2                                         | 5     | 19,64    | 15,61    | 12,21  |
| 2                                         | 10    | 6,20     | 9,31     | 5,83   |
| 3                                         | 1     | 13,08    | 12,96    | 6,84   |
| 3                                         | 5     | 10,07    | 18,84    | 14,58  |
| 3                                         | 10    | 15,61    | 22,50    | 21,36  |
| 4                                         | 1     | 10,22    | 15,96    | 15,50  |
| 4                                         | 5     | 20,96    | 16,18    | 17,47  |
| 4                                         | 10    | 15,41    | 22,76    | 18,25  |
| 0                                         | 0     | 18,94    | 7,46     | 13,35  |
| ADEVA                                     |       |          |          |        |
| F. Var                                    | gl    | S. Cuad. | C. Medio | Fisher |
| Total                                     | 38    | 826,55   |          |        |
| Bloques                                   | 2     | 8,22     | 4,11     | 0,26   |
| Producto                                  | 3     | 100,13   | 33,38    | 2,09   |
| Dosis                                     | 2     | 46,23    | 23,11    | 1,45   |
| Int. AB                                   | 6     | 276,07   | 46,01    | 2,88   |
| Ts vs Resto                               | 1     | 13,04    | 13,04    | 0,82   |
| Error                                     | 24    | 382,86   | 15,95    |        |
| CV %                                      |       |          | 26,19    |        |
| Media                                     |       |          | 15,25    |        |
| Separación de medias según Tukey (p<0,05) |       |          |          |        |
| Producto                                  | Media | Grupo    |          |        |
| 1                                         | 16,79 | a        |          |        |
| 2                                         | 12,82 | a        |          |        |
| 3                                         | 15,09 | a        |          |        |
| 4                                         | 16,97 | a        |          |        |
|                                           |       |          |          |        |
| Dosis                                     | Media | Grupo    |          |        |
| 1                                         | 13,87 | a        |          |        |
| 5                                         | 16,56 | a        |          |        |
| 10                                        | 15,83 | a        |          |        |
|                                           |       |          |          |        |
| Int. AB                                   | Media | Grupo    |          |        |
| A1B1                                      | 15,11 | b        |          |        |
| A1B2                                      | 17,70 | ab       |          |        |
| A1B3                                      | 17,58 | ab       |          |        |
| A2B1                                      | 15,54 | b        |          |        |
| A2B2                                      | 15,82 | b        |          |        |
| A2B3                                      | 7,11  | c        |          |        |
| A3B1                                      | 10,96 | bc       |          |        |
| A3B2                                      | 14,50 | bc       |          |        |
| A3B3                                      | 19,82 | a        |          |        |
| A4B1                                      | 13,89 | bc       |          |        |
| A4B2                                      | 18,20 | a        |          |        |
| A4B3                                      | 18,80 | a        |          |        |
|                                           |       |          |          |        |
| Ts vs Resto                               | Media | Grupo    |          |        |
| 0                                         | 13,25 | a        |          |        |
| Resto                                     | 15,42 | a        |          |        |

| Frutos/planta                             |       |          |          |        |
|-------------------------------------------|-------|----------|----------|--------|
| Producto                                  | Dosis | Rep      |          |        |
|                                           |       | I        | II       | III    |
| 1                                         | 1     | 44,67    | 36,50    | 44,33  |
| 1                                         | 5     | 37,00    | 56,67    | 55,67  |
| 1                                         | 10    | 52,67    | 39,00    | 59,00  |
| 2                                         | 1     | 58,00    | 46,00    | 24,33  |
| 2                                         | 5     | 52,00    | 41,33    | 32,33  |
| 2                                         | 10    | 16,67    | 25,00    | 15,67  |
| 3                                         | 1     | 35,67    | 35,33    | 18,67  |
| 3                                         | 5     | 28,33    | 53,00    | 41,00  |
| 3                                         | 10    | 45,33    | 65,33    | 62,00  |
| 4                                         | 1     | 29,67    | 46,33    | 45,00  |
| 4                                         | 5     | 54,00    | 41,67    | 45,00  |
| 4                                         | 10    | 43,33    | 64,00    | 51,33  |
| 0                                         | 0     | 64,33    | 25,33    | 45,33  |
| ADEVA                                     |       |          |          |        |
| F. Var                                    | gl    | S. Cuad. | C. Medio | Fisher |
| Total                                     | 38    | 6831,92  |          |        |
| Bloques                                   | 2     | 50,24    | 25,12    | 0,19   |
| Producto                                  | 3     | 923,86   | 307,95   | 2,29   |
| Dosis                                     | 2     | 305,67   | 152,83   | 1,14   |
| Int. AB                                   | 6     | 2309,87  | 384,98   | 2,86   |
| Ts vs Resto                               | 1     | 13,06    | 13,06    | 0,10   |
| Error                                     | 24    | 3229,22  | 134,55   |        |
| CV %                                      |       |          | 26,98    |        |
| Media                                     |       |          | 43,00    |        |
| Separación de medias según Tukey (p<0,05) |       |          |          |        |
| Producto                                  | Media | Grupo    |          |        |
| 1                                         | 47,28 | a        |          |        |
| 2                                         | 34,59 | a        |          |        |
| 3                                         | 42,74 | a        |          |        |
| 4                                         | 46,70 | a        |          |        |
|                                           |       |          |          |        |
| Dosis                                     | Media | Grupo    |          |        |
| 1                                         | 38,71 | a        |          |        |
| 5                                         | 44,83 | a        |          |        |
| 10                                        | 44,94 | a        |          |        |
|                                           |       |          |          |        |
| Int. AB                                   | Media | Grupo    |          |        |
| A1B1                                      | 41,83 | bc       |          |        |
| A1B2                                      | 49,78 | ab       |          |        |
| A1B3                                      | 50,22 | ab       |          |        |
| A2B1                                      | 42,78 | b        |          |        |
| A2B2                                      | 41,89 | bc       |          |        |
| A2B3                                      | 19,11 | e        |          |        |
| A3B1                                      | 29,89 | d        |          |        |
| A3B2                                      | 40,78 | c        |          |        |
| A3B3                                      | 57,56 | a        |          |        |
| A4B1                                      | 40,33 | c        |          |        |
| A4B2                                      | 46,89 | b        |          |        |
| A4B3                                      | 52,89 | ab       |          |        |
|                                           |       |          |          |        |
| Ts vs Resto                               | Media | Grupo    |          |        |
| 0                                         | 45,00 | a        |          |        |
| Resto                                     | 42,83 | a        |          |        |

| Peso/fruto                                |       |          |          |          |
|-------------------------------------------|-------|----------|----------|----------|
| Producto                                  | Dosis | Rep      |          |          |
|                                           |       | I        | II       | III      |
| 1                                         | 1     | 0,36     | 0,36     | 0,36     |
| 1                                         | 5     | 0,36     | 0,36     | 0,36     |
| 1                                         | 10    | 0,35     | 0,35     | 0,35     |
| 2                                         | 1     | 0,36     | 0,36     | 0,36     |
| 2                                         | 5     | 0,38     | 0,38     | 0,38     |
| 2                                         | 10    | 0,37     | 0,37     | 0,37     |
| 3                                         | 1     | 0,37     | 0,37     | 0,37     |
| 3                                         | 5     | 0,36     | 0,36     | 0,36     |
| 3                                         | 10    | 0,34     | 0,34     | 0,34     |
| 4                                         | 1     | 0,34     | 0,34     | 0,34     |
| 4                                         | 5     | 0,39     | 0,39     | 0,39     |
| 4                                         | 10    | 0,36     | 0,36     | 0,36     |
| 0                                         | 0     | 0,29     | 0,29     | 0,29     |
| ADEVA                                     |       |          |          |          |
| F. Var                                    | gl    | S. Cuad. | C. Medio | Fisher   |
| Total                                     | 38    | 0,0182   |          |          |
| Bloques                                   | 2     | 0,0000   | 0,0000   | 0,00     |
| Producto                                  | 3     | 0,0015   | 0,0005   | 2,85E+12 |
| Dosis                                     | 2     | 0,0012   | 0,0006   | 3,59E+12 |
| Int. AB                                   | 6     | 0,0031   | 0,0005   | 3,04E+12 |
| Ts vs Resto                               | 1     | 0,0124   | 0,0124   | 7,20E+13 |
| Error                                     | 24    | 0,0000   | 0,0000   |          |
| CV %                                      |       |          | 0,00     |          |
| Media                                     |       |          | 0,36     |          |
| Separación de medias según Tukey (p<0,05) |       |          |          |          |
| Producto                                  | Media | Grupo    |          |          |
| 1                                         | 0,36  | b        |          |          |
| 2                                         | 0,37  | a        |          |          |
| 3                                         | 0,36  | b        |          |          |
| 4                                         | 0,36  | b        |          |          |
|                                           |       |          |          |          |
| Dosis                                     | Media | Grupo    |          |          |
| 1                                         | 0,36  | b        |          |          |
| 5                                         | 0,37  | a        |          |          |
| 10                                        | 0,36  | b        |          |          |
|                                           |       |          |          |          |
| Int. AB                                   | Media | Grupo    |          |          |
| A1B1                                      | 0,36  | d        |          |          |
| A1B2                                      | 0,36  | d        |          |          |
| A1B3                                      | 0,35  | e        |          |          |
| A2B1                                      | 0,36  | d        |          |          |
| A2B2                                      | 0,38  | b        |          |          |
| A2B3                                      | 0,37  | c        |          |          |
| A3B1                                      | 0,37  | c        |          |          |
| A3B2                                      | 0,36  | d        |          |          |
| A3B3                                      | 0,34  | f        |          |          |
| A4B1                                      | 0,34  | f        |          |          |
| A4B2                                      | 0,39  | a        |          |          |
| A4B3                                      | 0,36  | d        |          |          |
|                                           |       |          |          |          |
| Ts vs Resto                               | Media | Grupo    |          |          |
| 0                                         | 0,29  |          |          |          |
| Resto                                     | 0,36  | a        |          |          |

**Tabla 26-4.** ANOVA. Contenido de pulpa de los frutos de pitahaya amarilla, evaluado a los 120 DDABF.

| Fuente de variación | GL | SC    | MSC   | valor F | Valor P   |
|---------------------|----|-------|-------|---------|-----------|
| Tratamientos        | 12 | 454,8 | 37,90 | 4,334   | 0,0011 ** |
| Bloque              | 2  | 10,2  | 5,11  | 0,585   | 0,5651    |
| Error               | 24 | 209,9 | 8,74  |         |           |
| Total               | 38 |       |       |         |           |
| CV                  |    |       |       |         | 5,504     |

Diferencias significativas \*(p&lt;0,05), diferencias altamente significativas \*\*(p&lt;0,05), ns: no significativo (p&gt;0,05).

Realizado por: Meneses, Jhon. 2023.

**Tabla 29-4.** ANOVA. Contenido de cáscara de los frutos de pitahaya amarilla, evaluado a los 120 DDABF.

| Fuente de variación | GL | SC    | MSC   | valor F | Valor P   |
|---------------------|----|-------|-------|---------|-----------|
| Tratamientos        | 12 | 454,8 | 37,90 | 4,334   | 0,0011 ** |
| Bloque              | 2  | 10,2  | 5,11  | 0,585   | 0,5651    |
| Error               | 24 | 209,9 | 8,74  |         |           |
| Total               | 38 |       |       |         |           |
| CV                  |    |       |       |         | 6,390     |

Diferencias significativas \*(p&lt;0,05), diferencias altamente significativas \*\*(p&lt;0,05), ns: no significativo (p&gt;0,05).

Realizado por: Meneses, Jhon. 2023.

**Tabla 34-4.** ANOVA. Contenido de SST en frutos de pitahaya amarilla a los 120 DDABF.

| Fuente de variación | GL | SC    | MSC   | valor F | Valor P  |
|---------------------|----|-------|-------|---------|----------|
| Tratamientos        | 12 | 73,00 | 6,083 | 2,692   | 0,0188 * |
| Bloque              | 2  | 8,47  | 4,236 | 1,874   | 0,1752   |
| Error               | 24 | 54,23 | 2,260 |         |          |
| Total               | 38 |       |       |         |          |
| CV                  |    |       |       |         | 12,030   |

Diferencias significativas \*(p&lt;0,05), diferencias altamente significativas \*\*(p&lt;0,05), ns: no significativo (p&gt;0,05).

Realizado por: Meneses, Jhon. 2023.

**Tabla 38-4.** Contenido de Acidez Titulable Total de los frutos de pitahaya amarilla, evaluado a los 120 DDABF.

| Fuente de variación | GL | SC    | MSC     | valor F | Valor P    |
|---------------------|----|-------|---------|---------|------------|
| Tratamientos        | 12 | 3,203 | 0,26688 | 3,576   | 0,00382 ** |
| Bloque              | 2  | 0,022 | 0,01103 | 0,148   | 0,86345    |
| Error               | 24 | 1,791 | 0,07464 |         |            |
| Total               | 38 |       |         |         |            |
| CV                  |    |       |         |         | 17,184     |

Diferencias significativas \*(p&lt;0,05), diferencias altamente significativas \*\*(p&lt;0,05), ns: no significativo (p&gt;0,05).

Realizado por: Meneses, Jhon. 2023.

**Tabla 41-4.** ANOVA. Dureza de los frutos de pitahaya amarilla, evaluado a los 120 DDABF.

| Fuente de variación | GL | SC    | MSC   | valor F | Valor P    |
|---------------------|----|-------|-------|---------|------------|
| Tratamientos        | 12 | 38,16 | 3,180 | 3,118   | 0,00855 ** |
| Bloque              | 2  | 0,91  | 0,457 | 0,448   | 0,64399    |
| Error               | 24 | 24,48 | 1,020 |         |            |
| Total               | 38 |       |       |         |            |
| CV                  |    |       |       |         | 12,354     |

Diferencias significativas \*(p&lt;0,05), diferencias altamente significativas \*\*(p&lt;0,05), ns: no significativo (p&gt;0,05).

Realizado por: Meneses, Jhon. 2023.
