# Supplementary material
Source: MDPI journal article supplement (https://www.mdpi.com/2311-7524/10/5/493)
Supplement: s1 [file s1]

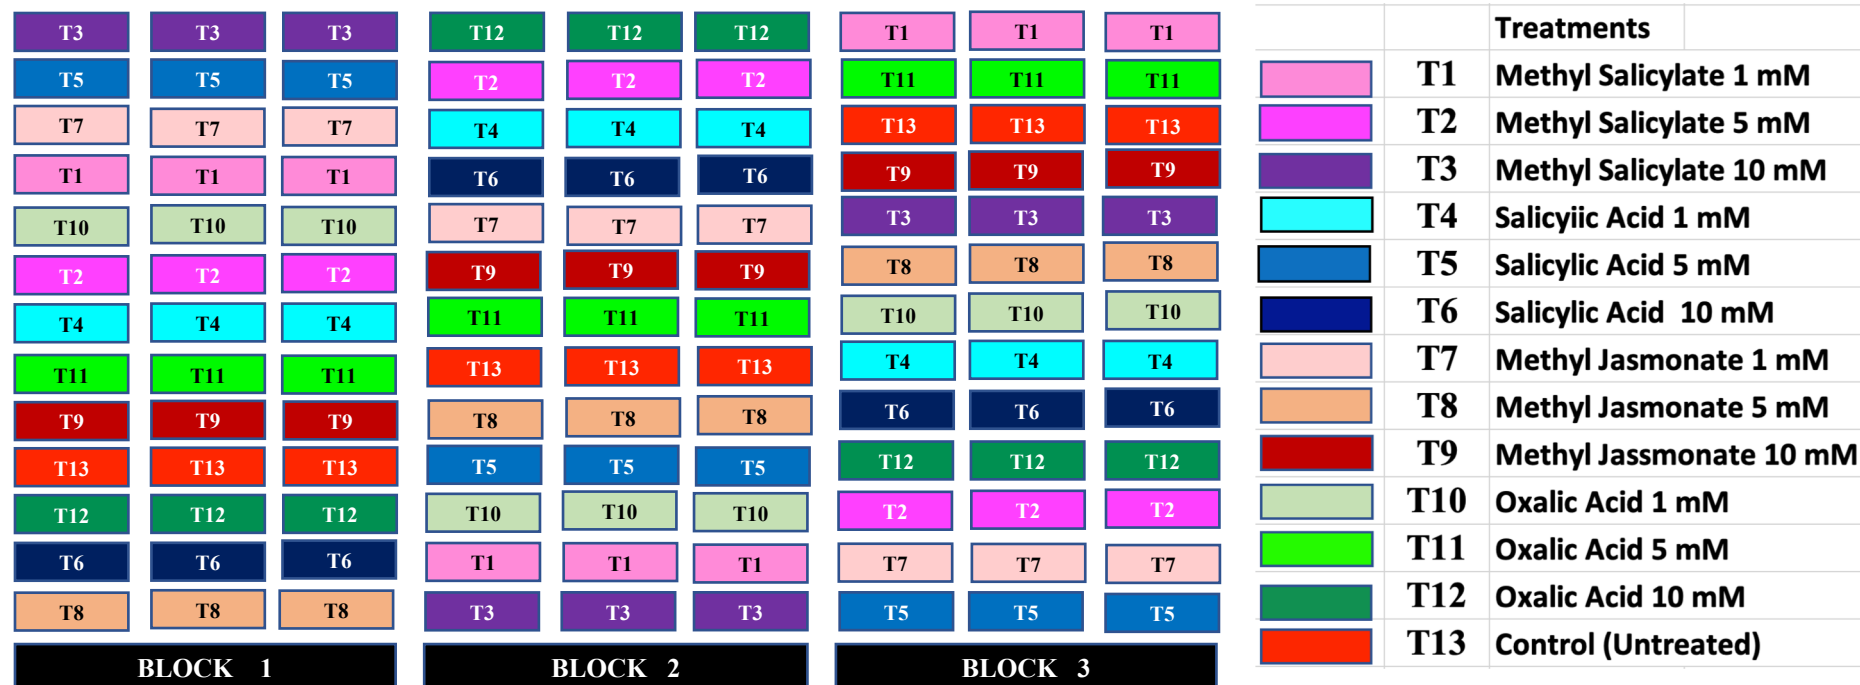

**Fig. S1.** Experimental design with distribution of treatments at random in 3 blocks for pitahaya preharvest elicitors
